# Supplementary material for: Translational repression by a miniature inverted-repeat transposable element in the 3′ untranslated region
Source: PubMed Central journal article supplement (PMC5338036; doi:10.1038/ncomms14651), 2017-03-03
Supplement: ncomms14651-s1.pdf [file ncomms14651-s1.pdf]

## Supplementary Figures

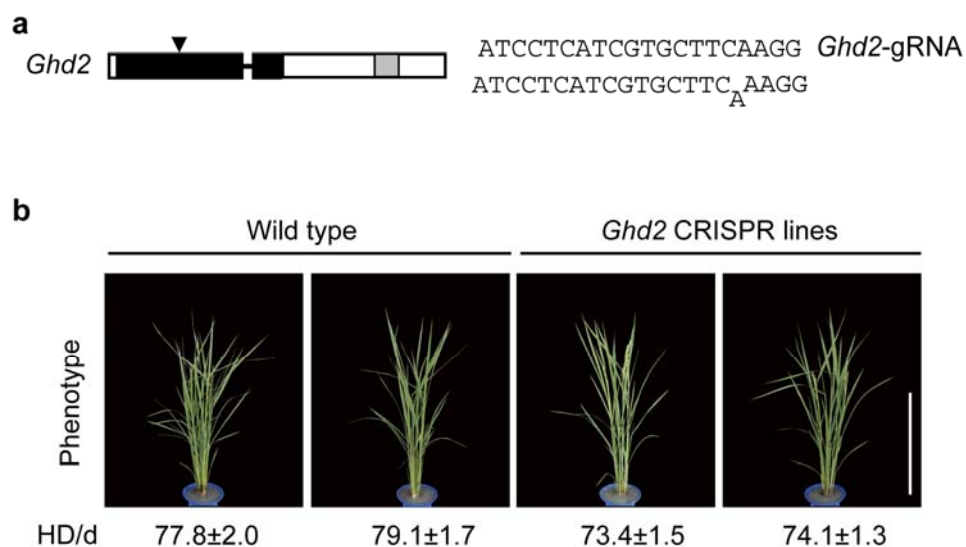

**Supplementary Figure 1. Phenotypes of WT and *Ghd2* CRISPR lines at the heading stage.** **a**, The sgRNA was used for *Ghd2* editing in the coding region. The black triangle indicates the sgRNA location. Exons are in black; 3' and 5' UTRs are in white; the transposable element (sMITE) is in gray; and the intron is indicated as a line. The CRISPR lines were confirmed by sequencing, shown in the right panel. **b**, Two independent transgenic lines with reading-frame-shifted mutation in the target region showed an earlier flowering time. Wild type is the segregated non-transgenic genotype. HD: heading date (days). Scale bar, 50 cm. The data represent the means  $\pm$  s.d., n=10.

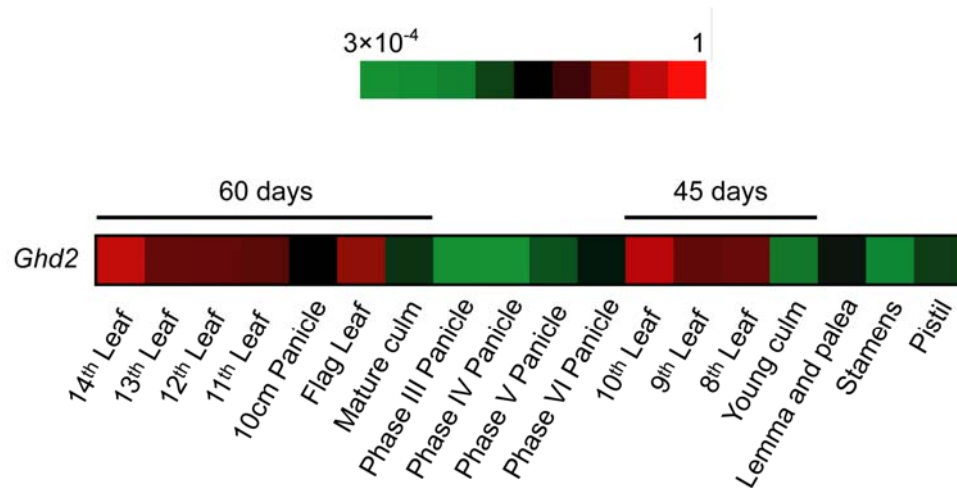

**Supplementary Figure 2. Quantitative expression level analysis of *Ghd2* in rice tissues.** Relative expression level is quantified based on  $\Delta\Delta Ct/\Delta\Delta Ct_{\max}$ . The 8<sup>th</sup> to 14<sup>th</sup> leaves were harvested according to phyllotaxy of rice. Phase III panicle, 1-2 mm; Phase IV panicle, 4-5 mm; Phase V panicle, 25 mm; Phase VI panicle, 60 mm. The numbers above the heatmap indicate the sample harvest day after germination.

● WT(ZH11)-LD    ● *Ghd2*FLAU OE-LD    ● WT(ZH11)-SD    ● *Ghd2*FLAU OE-SD

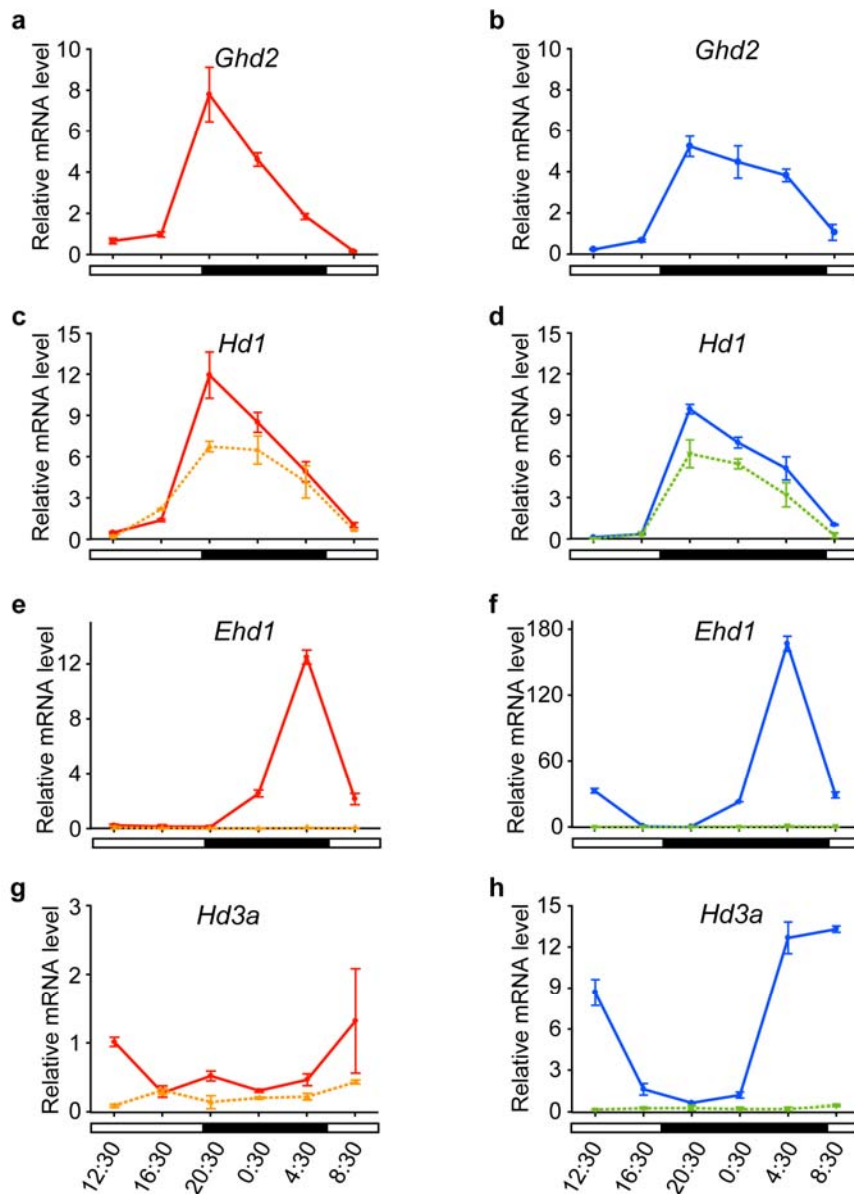

**Supplementary Figure 3. Diurnal expression patterns of *Ghd2* and flowering genes in the wild type and *Ghd2* FLAU lines examined by quantitative RT-PCR.** **a**, *Ghd2* expression level under long day (LD) conditions. **b**, *Ghd2* expression level under short day (SD) conditions. **c**, *Hd1* expression level under LD conditions. **d**, *Hd1* expression level under SD conditions. **e**, *Ehd1* expression level under LD conditions. **f**, *Ehd1* expression level under SD conditions. **g**, *Hd3a* expression level under LD conditions. **h**, *Hd3a* expression level under SD conditions. Data indicate mean  $\pm$  s.d.,  $n=3$ . The black and white bars below each plot indicate the dark and light period of a day, respectively. The numbers under the bars in the plot **g** and **h** indicate the sample harvest time.

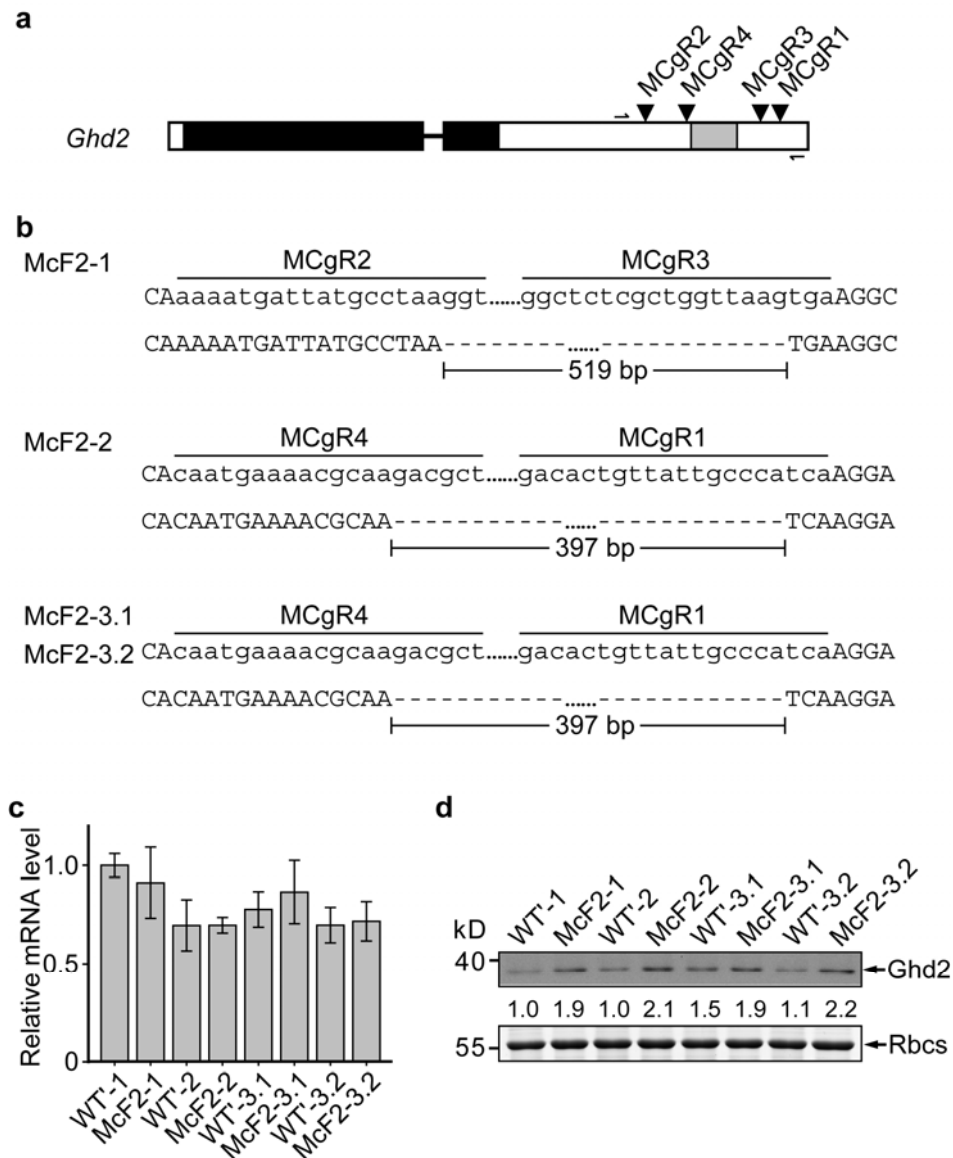

**Supplementary Figure 4. The sgRNAs used for the sMITE excision and sMITE excision line genotyping and phenotyping.** **a**, The location of sgRNAs in the *Ghd2* 3' UTR. Exons are in black; 3' and 5' UTRs are in white; the transposable element (sMITE) is in gray; and the intron is indicated as a line. The black triangles indicate sgRNAs, and the arrows indicate the PCR primers for amplification. **b**, The excision region mediated by sgRNAs was confirmed by sequencing in the MITE excision lines. McF2-1, McF2-2, and McF2-3 are the names of excision lines segregated from the progenies ( $BC_1F_2$ ) of the backcrosses between three different  $T_2$  transgenic excision plants and wild type. **c**, Quantitative expression of *Ghd2* mRNA in the sMITE excision lines (McF2) and the corresponding WT' segregated from the backcrosses. Another replicate of the experiment in Fig. 2c. The data represent the means  $\pm$  s.d.,  $n=3$ . **d**, The *Ghd2* protein was measured by western blotting with the anti-*Ghd2* antibody. Another replicate of the experiment in Fig. 2d. Rubisco (Rbcs) was loaded as a control. The numbers between two blots indicate relative abundance normalized by Rbcs for single samples.

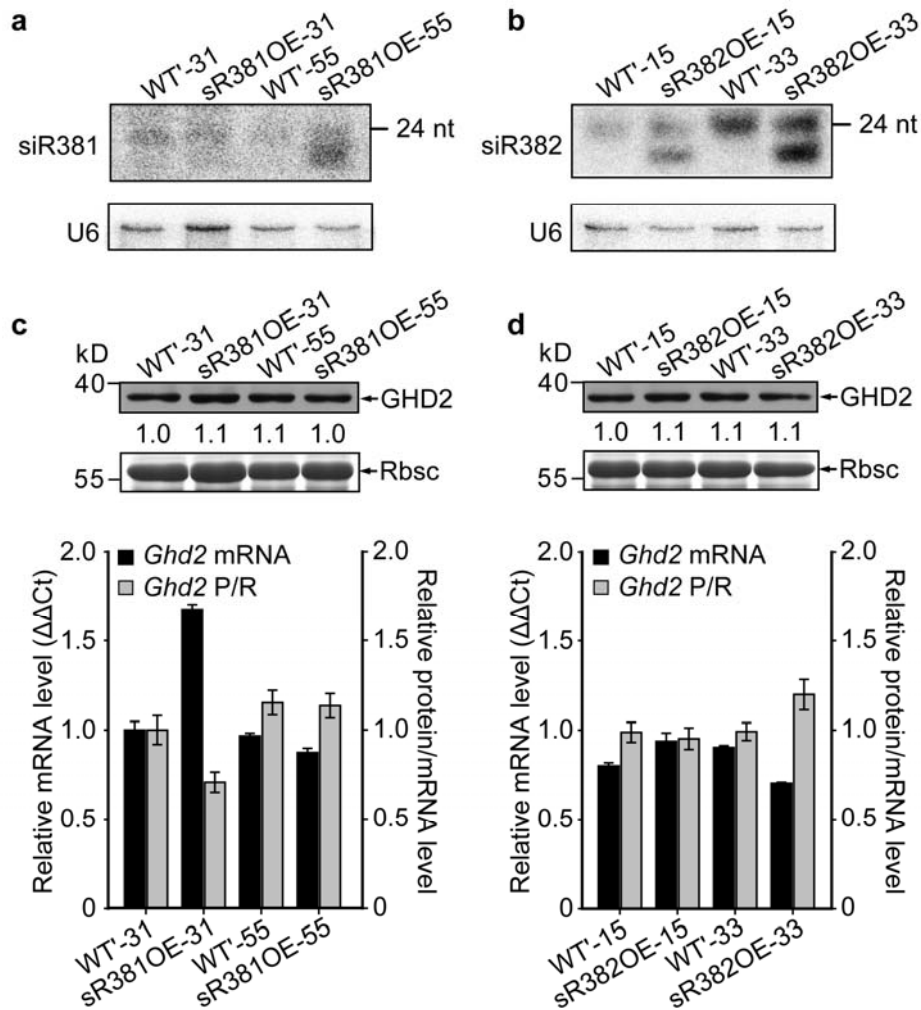

**Supplementary Figure 5. The *Ghd2* mRNA and protein abundance in siRNAs over-expression lines.** **a** and **b**, Small RNA northern blots to analyze the siRNA abundance in the siR381 and siR382 over-expression lines. **c** and **d**, *Ghd2* protein (upper panel) and mRNA abundance (lower panel) are shown. The WT' indicates segregated non-transgenic line. The *Ghd2* protein level was measured by Western blotting with the anti-*Ghd2* antibody. Rubisco was loaded as a control. The numbers between two blots indicate relative abundance for single samples. The *Ghd2* relative expression level is based on  $\Delta\Delta Ct/\Delta\Delta Ct_{max}$ . Relative protein/mRNA level means quantified protein abundance versus relative mRNA level. Data in **c** and **d** indicate mean  $\pm$  s.d., n=3.

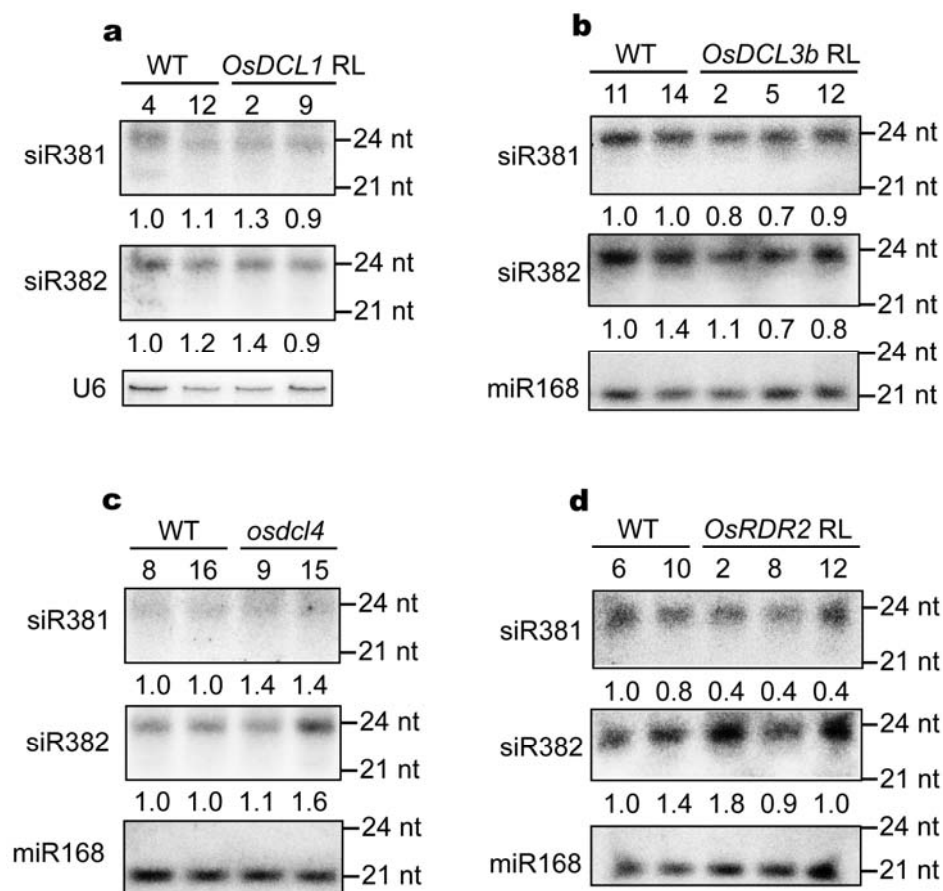

**Supplementary Figure 6. Small RNA northern blots to determine siRNAs in the RNAi lines or mutants of rice *Dicer-like (OsDCL)* and *RNA-dependent RNA polymerase2 (OsRDR2)* genes. a, *OsDCL1* RNAi lines (RL); b, *OsDCL3b* RNAi lines; c, *osdcl4* mutant lines; d, *OsRDR2* RNAi lines. In plot a, the U6 was probed as a loading control. In plots b, c, and d, the miR168 was probed as a loading control. The siR381 and siR382 probes are shown in the Figure 3a. The numbers under each siRNA blot indicate relative abundance.**

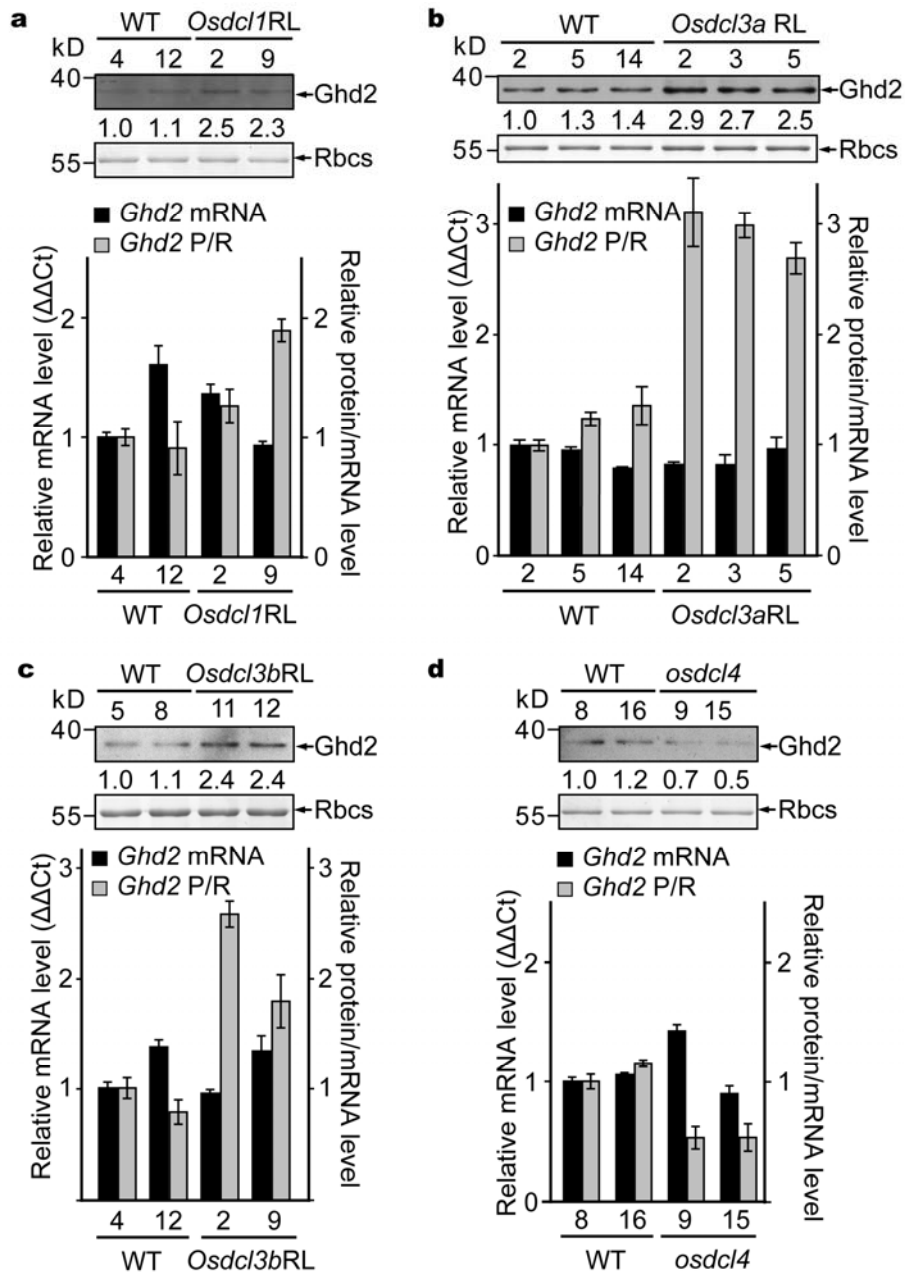

**Supplementary Figure 7. Endogenous *Ghd2* mRNA and protein levels in the RNAi line or mutant of rice Dicer-like (*OsDCL*) genes.** Western blots for *Ghd2* protein (upper panel) and qRT-PCR for *Ghd2* mRNA (lower panel) in *OsDCL1* (a), *OsDCL3a* (b), *OsDCL3b* (c) RNAi lines, and *osdcl4* (d) mutants. The *Ghd2* protein level was measured by Western blotting with the anti-*Ghd2* antibody. Rubisco was as a control. The numbers between two blots indicate relative abundance. The relative expression level is based on  $\Delta\Delta Ct/\Delta\Delta Ct_{max}$ . Relative protein/mRNA level means quantified protein abundance versus relative mRNA level. Data indicate mean  $\pm$  s.d., n=3.

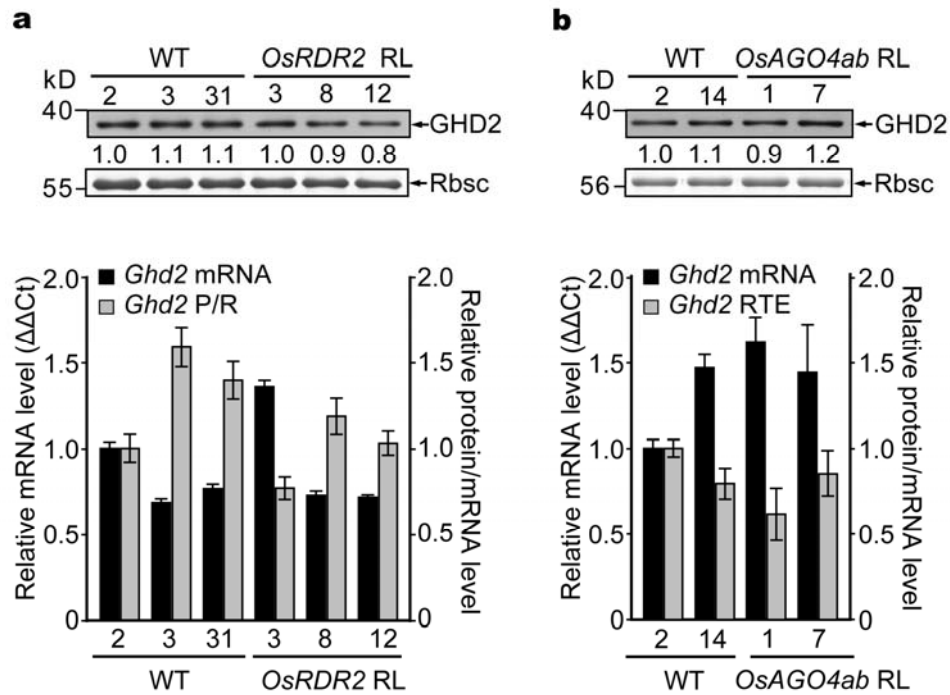

**Supplementary Figure 8. Endogenous *Ghd2* mRNA and protein levels in *OsRDR2* and *OsAGO4ab* RNAi lines.** Western blotting for *Ghd2* protein (upper panel) and qRT-PCR for *Ghd2* mRNA (lower panel) in *OsRDR2* (a) and *OsAGO4ab* (b) RNAi lines. The *Ghd2* protein level was measured by Western blotting with the anti-*Ghd2* antibody. Rubisco was as a loading control. The numbers between two blots indicate relative abundance for single samples. The relative expression level is based on  $\Delta\Delta Ct/\Delta\Delta Ct_{max}$ . Relative protein/mRNA level means quantified protein abundance versus relative mRNA level. Data indicate mean  $\pm$  s.d., n=3.



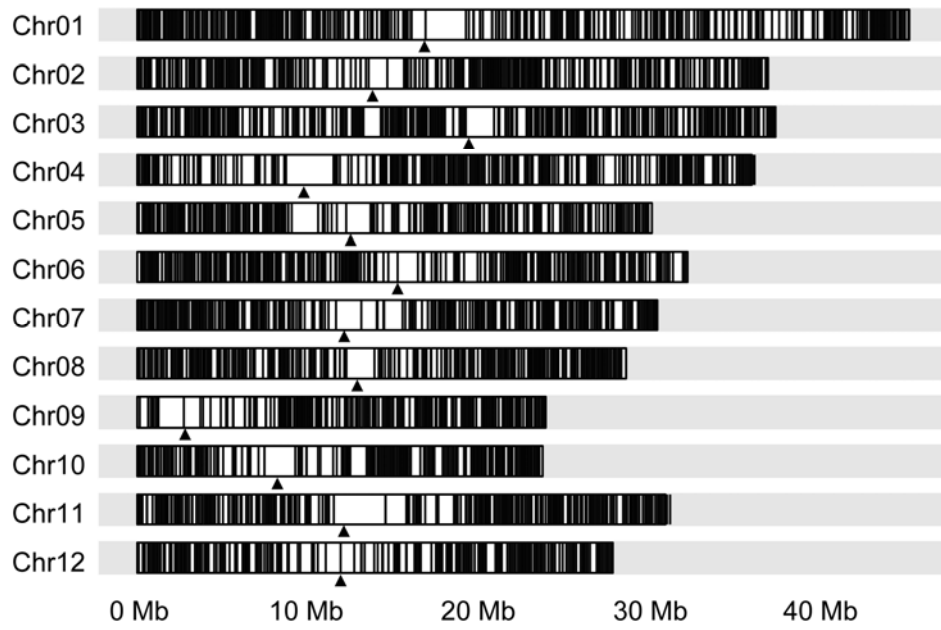

**Supplementary Figure 9. A karyogram of OsT38 distribution in rice genome.** Black line represents the OsT38. The triangles indicate centromeres.

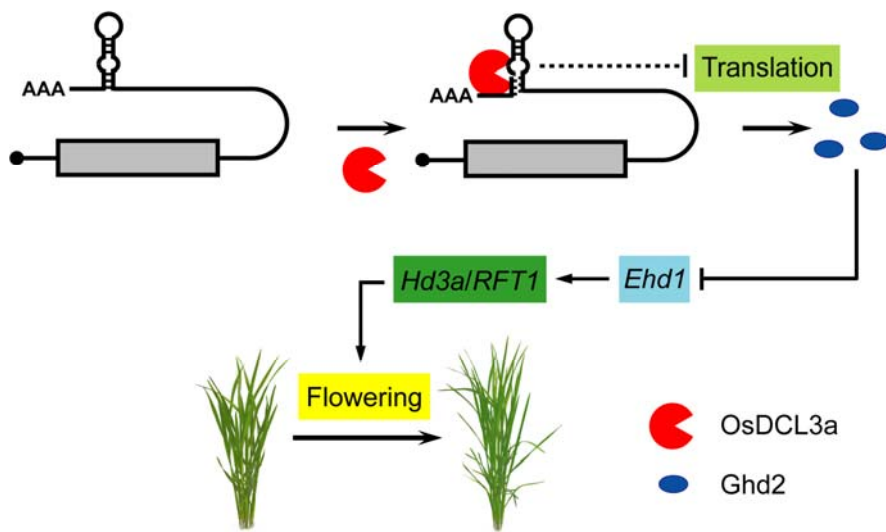

**Supplementary Figure 10. A hypothetical model of MITE-mediated translational repression to suppress rice flowering.**

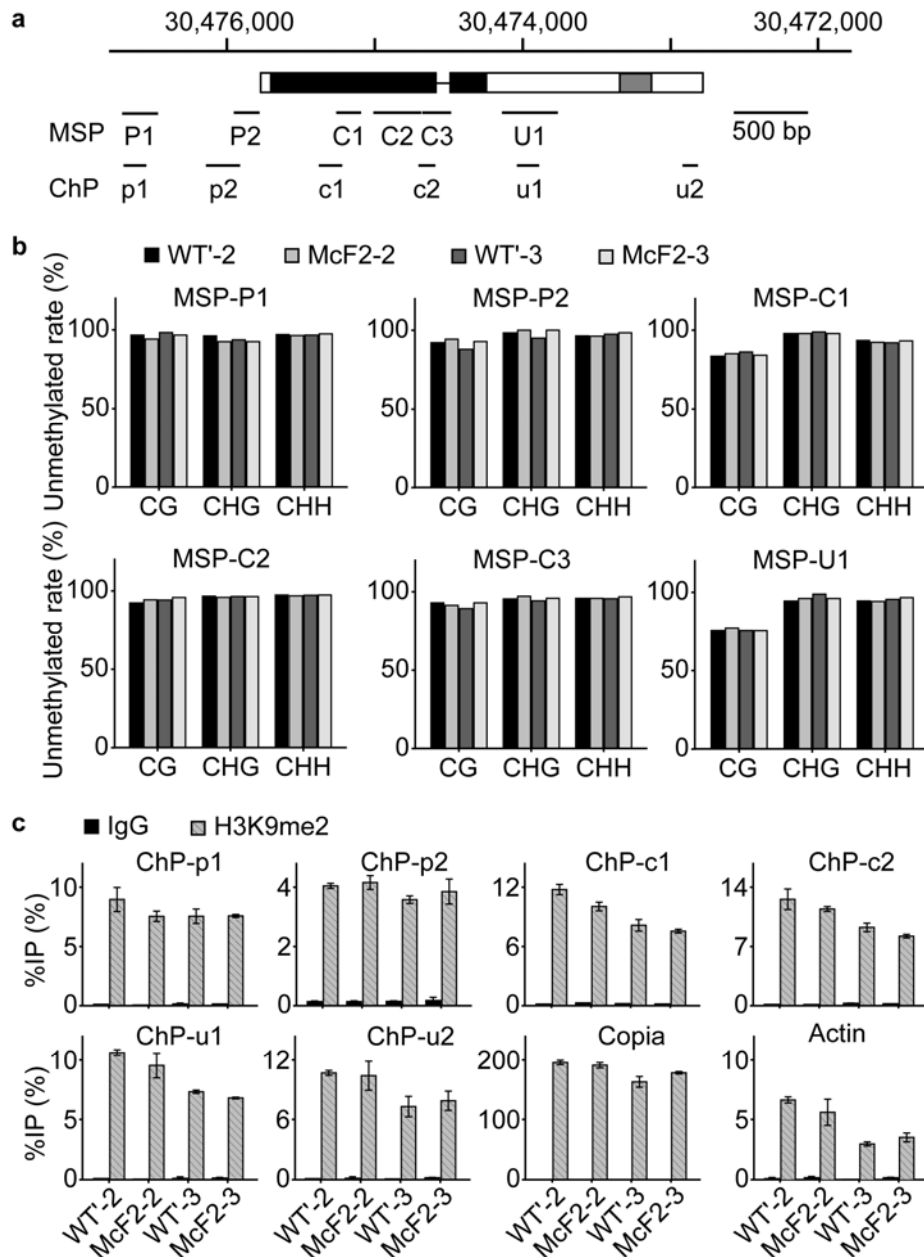

**Supplementary Figure 11. The DNA methylation and H3K9 dimethylation levels in the *Ghd2* locus.** **a**, Coding and untranslated regions of *Ghd2* gene are shown in black and white respectively; the transposable element (sMITE) is indicated in gray; and the intron is indicated as a line. The regions for bisulfite sequencing and the primers for ChIP-qPCR are indicated as MSP and ChP respectively. **b**, Bisulfite sequencing analysis of the DNA methylation level at the *Ghd2* locus. The CG, CHG, and CHH (H=A, T, or G) unmethylation levels are shown according to the sequencing data. WT', wild types without excision of the sMITE segregated from the CRISPR lines. **c**, The H3K9 dimethylation level at the *Ghd2* locus. A rice *Copia* retrotransposon and the actin gene are used as the positive and negative controls, respectively, for the H3K9me2. The ChIP signals are indicated by gray bars. The signals from the mouse IgG control are indicated by black bars. The ChIP results are indicated as percentage of input (%IP). Data indicate mean  $\pm$  s.d.,  $n=3$ .

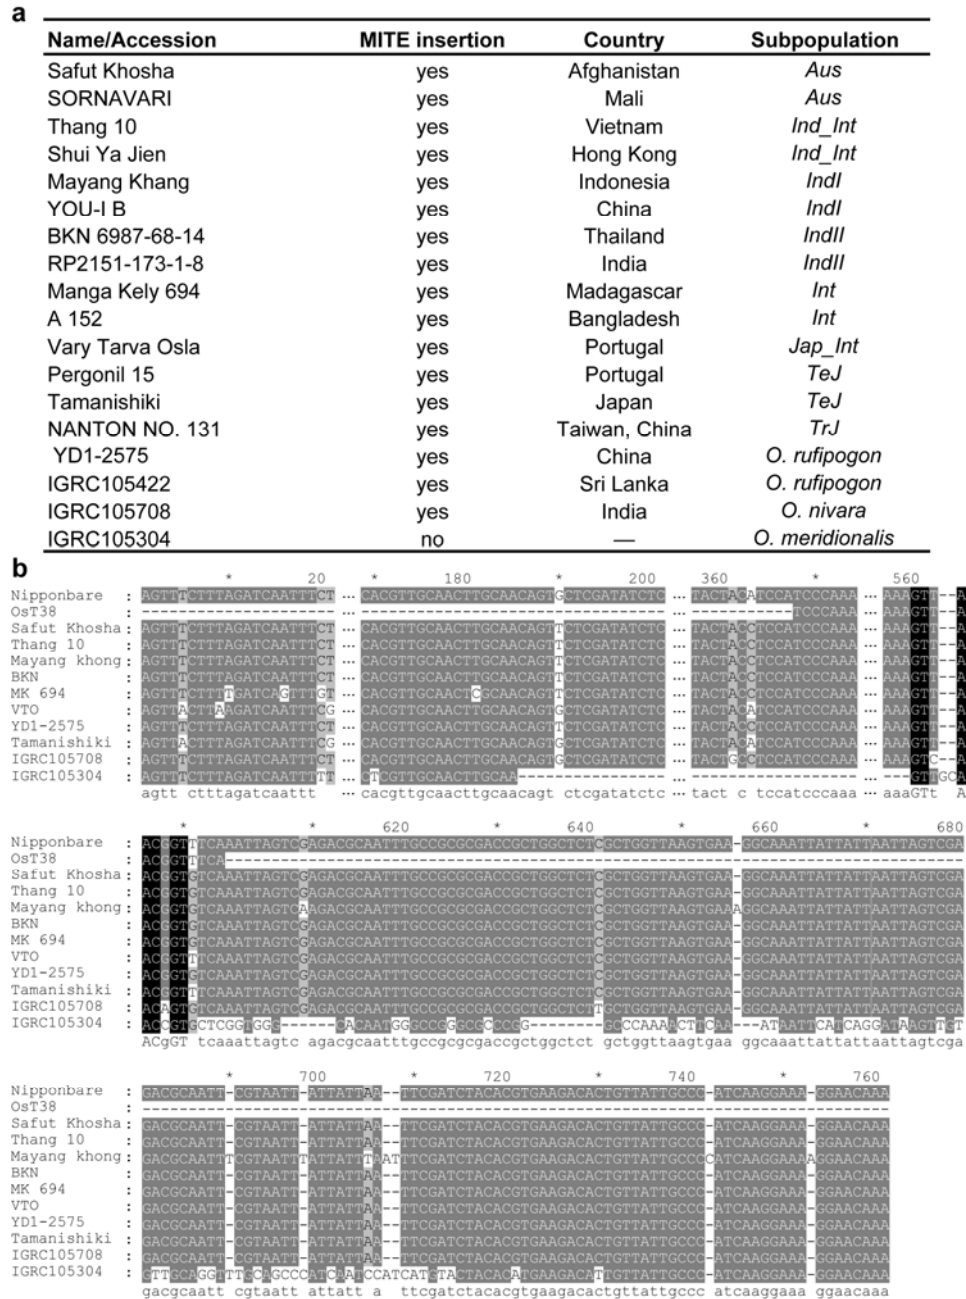

**Supplementary Figure 12. The alignment of *Ghd2* 3' UTR sequences from cultivated and wild rice. a, The summary of the *Ghd2* 3' UTR genomic organization in cultivated and wild rice. b, The DNA sequences alignment of representative cultivated and wild rice. The OsT38 indicates the SMITE sequences.**

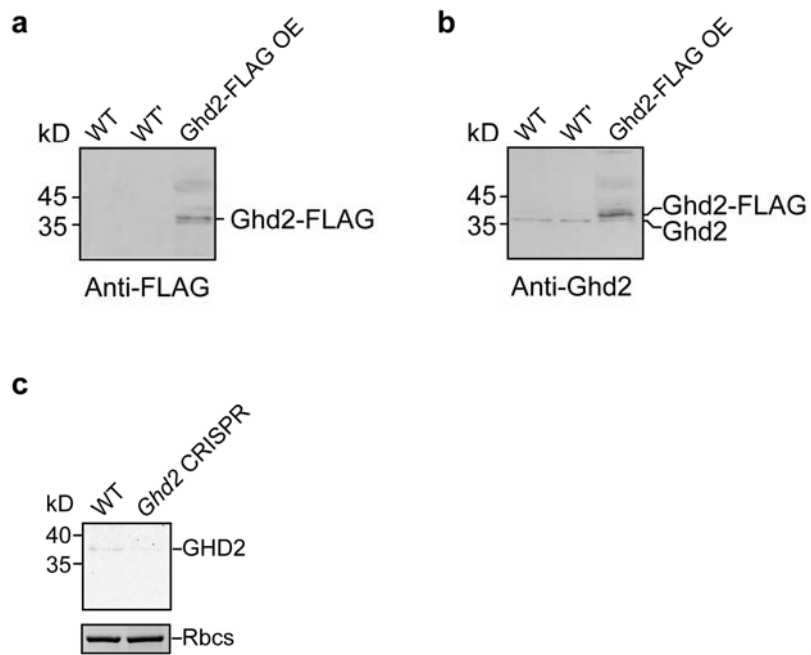

**Supplementary Figure 13. Specificity of anti-Ghd2 antibody.** The anti-Ghd2 antibody was validated in the Ghd2-FLAG transgenic line. **a**, anti-FLAG (Sigma), 1:3,000 dilution. **b**, anti-Ghd2, 1:1,000 dilution. **c**, anti-Ghd2, 1:2,000 dilution. Horseradish peroxidase (HRP) conjugated anti-mouse IgG and anti-rabbit IgG antibodies were employed as secondary antibodies.

**Fig.1d**

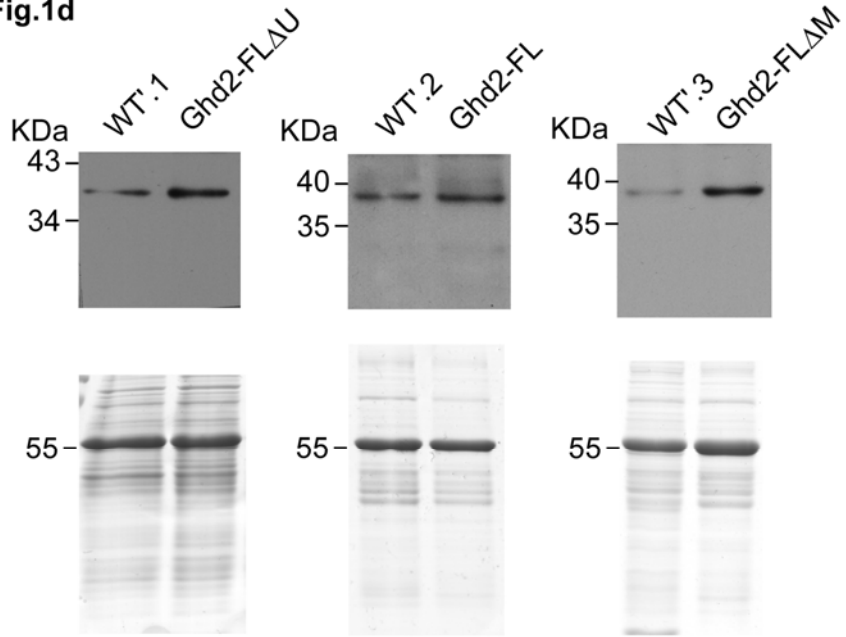

**Fig.2b**

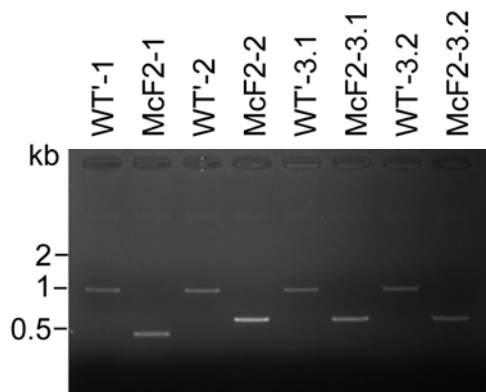

**Fig.2d**

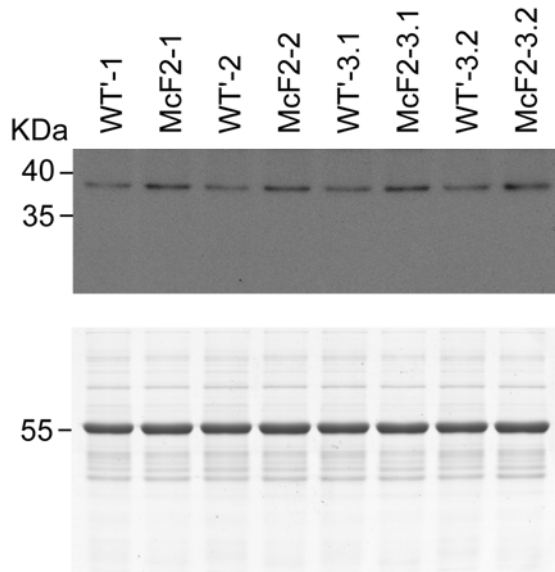

**Fig. 3d**

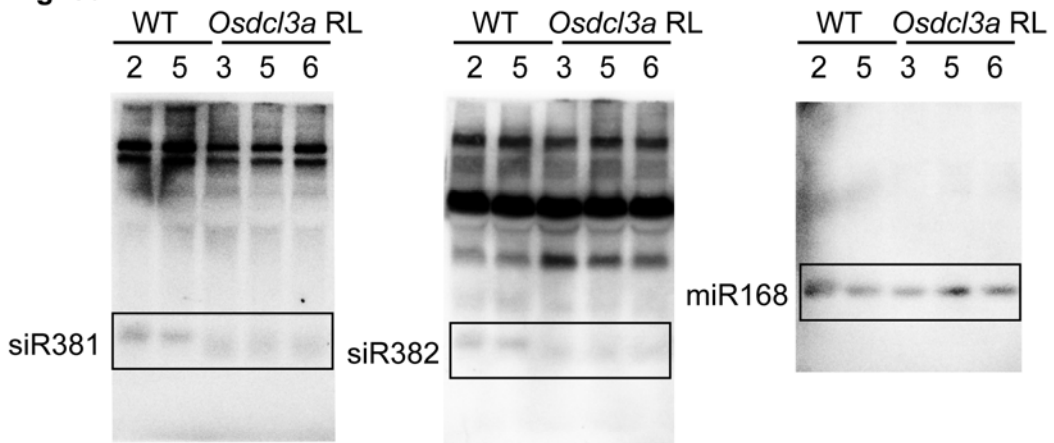

**Fig. 3f**

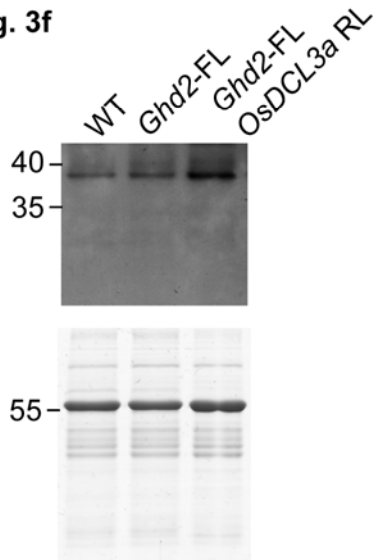

**SFig. 4d**

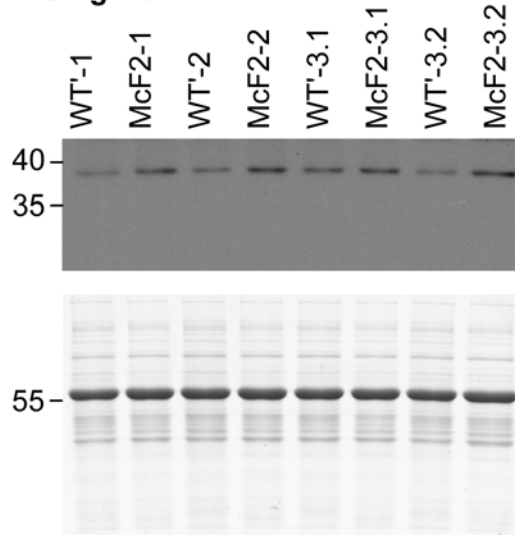

SFig. 5a

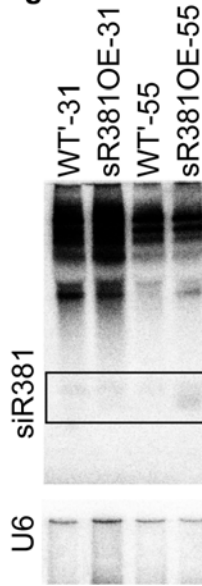

SFig. 5b

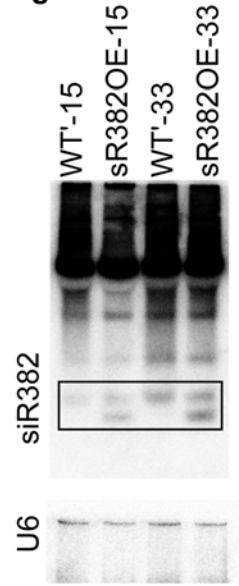

SFig. 5c-d

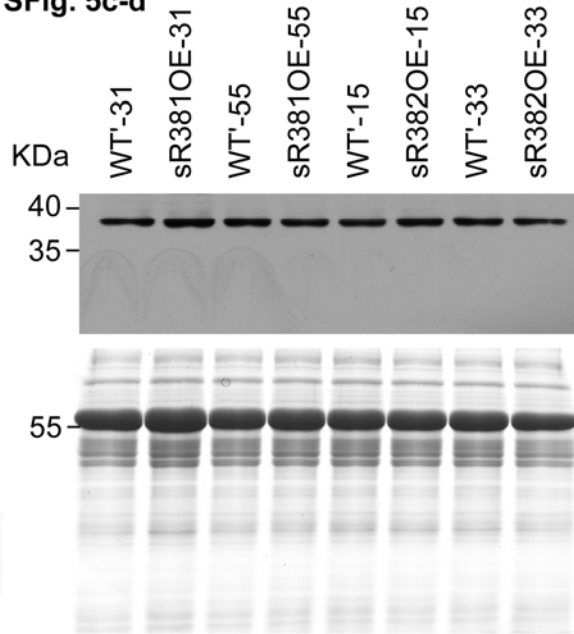

SFig. 6

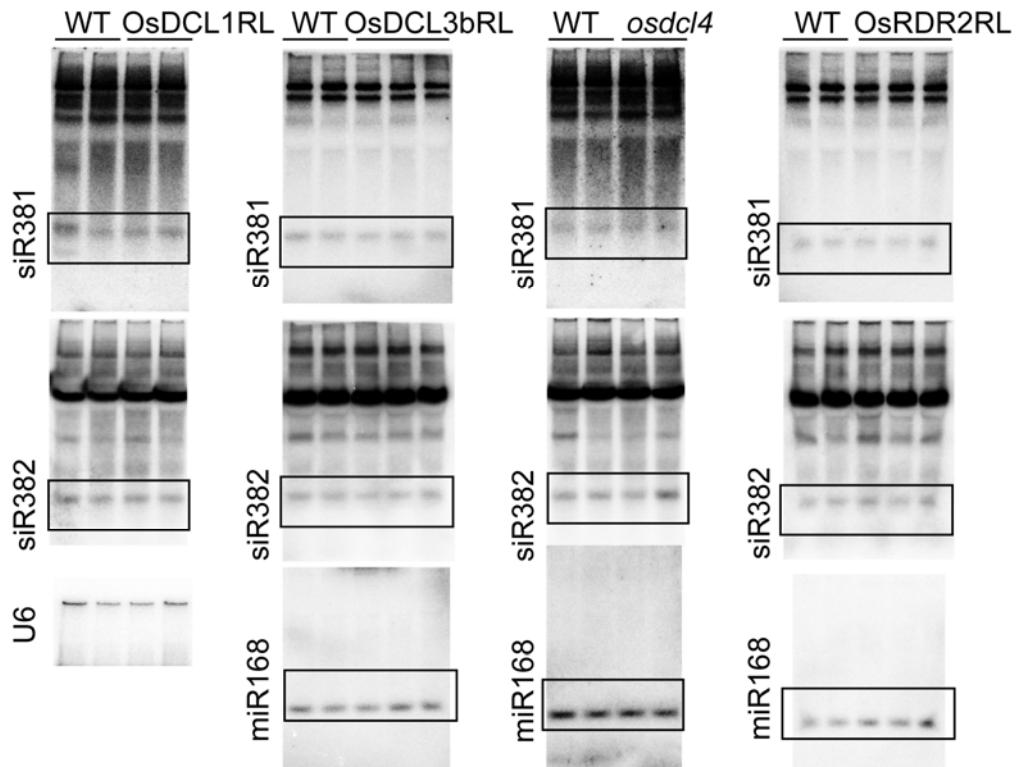



**SFig. 7a**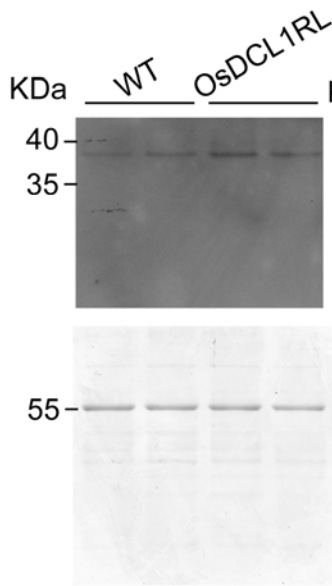**SFig. 7b**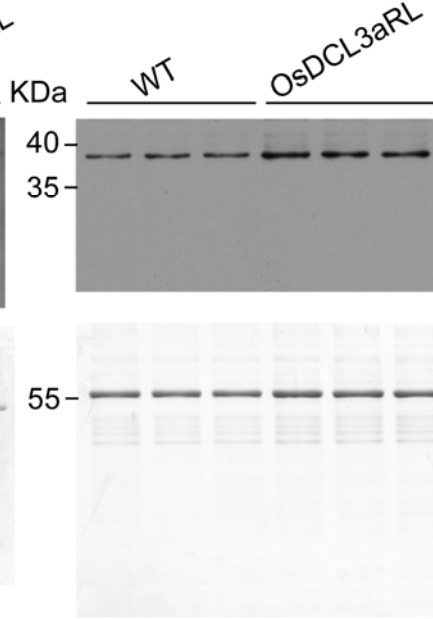**SFig. 7c**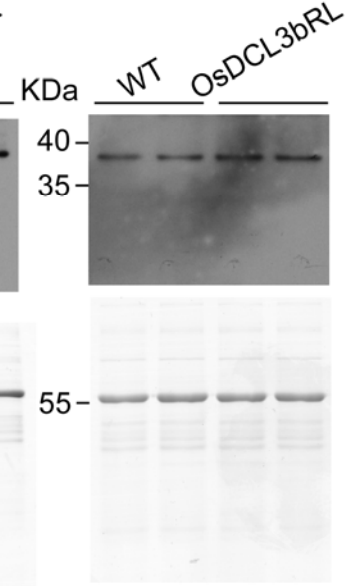**SFig. 7d**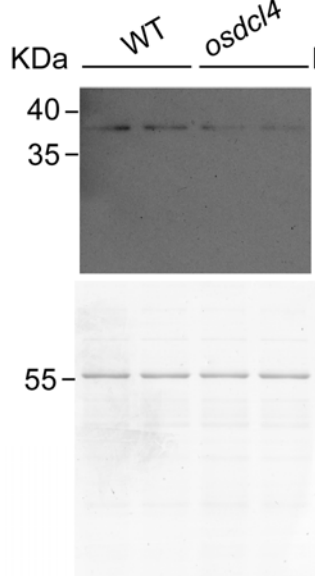**SFig. 8a**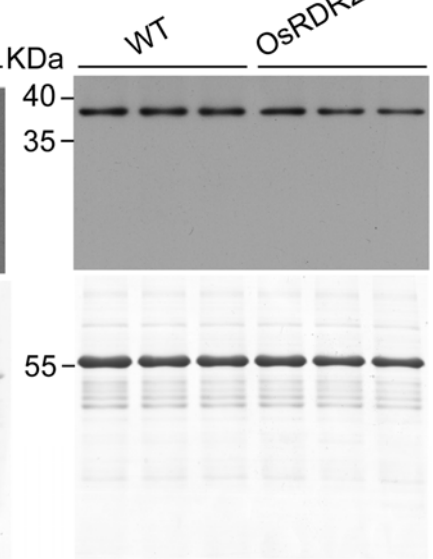**SFig. 8b**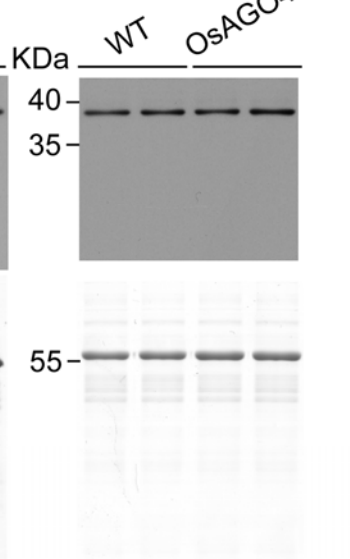

SFig. 13a

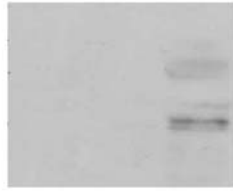

SFig. 13b

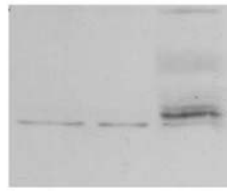

SFig. 13c

KDa

40-

35-

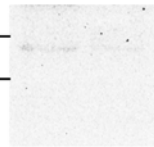

55-

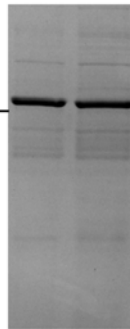

**Supplementary Figure 14. The original western blots, northern blots, and gel images.** The black frames indicate the portion showed in figures.

**Supplementary Table 1. Flowering time, plant height, and grain number of main panicle of *Ghd2*-FLΔU, *Ghd2*-FL, and *Ghd2*-FLΔM and their segregated non-transgenic lines.**

| <b>Genotype</b>    | <b>Line#</b> | <b>Number of days to heading</b> | <b>Plant height (cm)</b> | <b>grain number of main panicle</b> |
|--------------------|--------------|----------------------------------|--------------------------|-------------------------------------|
| <i>Ghd2</i> FLΔU + | 16           | 127.1±2.8                        | 107.8±1.9                | 216.8±13.1                          |
|                    | 21           | 119.7±3.0                        | 111.5±2.9                | 224.6±7.6                           |
|                    | 15           | 132.9±1.7                        | 107.0±2.3                | 219.9±9.7                           |
| <i>Ghd2</i> FLΔU - | 16           | 78.8±1.2                         | 85.2±1.7                 | 170.1±7.2                           |
|                    | 21           | 79.0±1.0                         | 84.9±1.6                 | 168.1±5.7                           |
|                    | 25           | 79.4±0.9                         | 84.5±1.5                 | 173.9±11.4                          |
| <i>Ghd2</i> FL +   | 40           | 93.8±1.1                         | 105.8±3.2                | 179.1±6.9                           |
|                    | 48           | 94.7±1.3                         | 103.6±3.5                | 181.9±5.2                           |
|                    | 58           | 97.9±1.6                         | 102.0±2.7                | 180.5±7.5                           |
| <i>Ghd2</i> FL -   | 40           | 79.7±0.7                         | 84.5±1.3                 | 186.0±6.1                           |
|                    | 48           | 79.0±0.9                         | 85.5±0.8                 | 185.0±7.1                           |
|                    | 58           | 79.3±0.6                         | 84.9±1.7                 | 189.4±7.3                           |
| <i>Ghd2</i> FLΔM + | 35           | 113.3±2.2                        | 107.8±3.3                | 209.5±11.1                          |
|                    | 43           | 109.7±1.6                        | 105.6±2.7                | 210.2±14.7                          |
|                    | 71           | 119.2±2.8                        | 109.4±2.4                | 213.7±12.2                          |
| <i>Ghd2</i> FLΔM - | 35           | 79.4±0.9                         | 85.2±2.1                 | 182.4±9.5                           |
|                    | 43           | 78.4±1.0                         | 84.4±1.4                 | 187.7±8.8                           |
|                    | 71           | 79.8±1.1                         | 85.8±2.0                 | 184.5±9.2                           |

Three independent transgenic lines were used for investigation in normal rice growing season at Wuhan, China. Data indicate mean ± s.d., n=20.

**Supplementary Table 2. Primer lists**

| <b>Primer name</b>    | <b>Primer sequence</b>                                    |
|-----------------------|-----------------------------------------------------------|
| <b>Cloning primer</b> | <b>Sequence 5'-&gt;3'</b>                                 |
| Ghd2 fl F BamHI       | ggatccTCTTTTGTGCTGGGAGATTTCTTCTGTT                        |
| Ghd2 fl R XbaI        | tctagaGAGGATTGCTGGGACAGAGTAAAAAATG                        |
| Ghd2 cds F KpnI       | ggtaccCTGGGAGATTTCTTCTGTTT                                |
| Ghd2 cds R BamHI      | ggatccTCGAGTCCATGAGGCATA                                  |
| Ghd2 fldM F inside    | GCGTCTCGACTAATTAATACTGGATGTAGTAATAATTTGCCGCGC<br>GA       |
| Ghd2 fldM R inside    | GCAAATTATTACTACATCCAGTATTAATTAGTCGAGACGCAATTT<br>GCCGC    |
| Ghd2 crispr F         | GGCAATCCTCATCGTGCTTCAAGG                                  |
| Ghd2 crispr R         | AAACCCTTGAAGCACGATGAGGAT                                  |
| Ghd2_TED PS1 F        | CGGGTCTCAcaataacagtgtctgcaccagccggg                       |
| Ghd2_TED PS1 R        | TAGGTCTCCATTGCCCATCAgttttagagctagaa                       |
| Ghd2_TED PS2 F        | CGGGTCTCAcataatcattttgcaccagccggg                         |
| Ghd2_TED PS2 R        | TAGGTCTCCTATGCCTAAGGTgttttagagctagaa                      |
| Ghd2_TED PS3 F        | CGGGTCTCAccagegagagcctgcaccagccggg                        |
| Ghd2_TED PS3 R        | TAGGTCTCCCTGGTTAAGTGAgttttagagctagaa                      |
| Ghd2_TED PS4 F        | CGGGTCTCAgcgttttcattgtgcaccagccggg                        |
| Ghd2_TED PS4 R        | TAGGTCTCCACGCAAGACGCTgttttagagctagaa                      |
| OsmiR440 F            | TTggtaccTCTGGACTTTTCATGTACTCCTGCT                         |
| OsmiR440 R            | TTggatccGGATAAGGGTCTGAAACAGGGAT                           |
| siR381 s              | TTGAATAAGACGAACGGTCAAACATGGCTAACACCGATGAGA                |
| siR381 as             | CCATGTTTGACCGTTCGTCTTATTCAAATACATAAGTTTATG                |
| siR381* s             | GCAATGTTTGACCGTTCGTCTTATTTCAGATCAAGCTAGGCCT               |
| siR381* as            | TCTGAATAAGACGAACGGTCAAACATGCCCAGCACCAACAATA               |
| siR382 s              | TTAAAAAGTCAACGGCGTCAAACATTGGCTAACACCGATGAGA               |
| asiR382 as            | CCAATGTTTGACGCCGTTGACTTTTTAATAACATAAGTTTATG               |
| asiR382* s            | GCAATGTTTGACGCCGTTGACTTTTTGATCAAGCTAGGCCT                 |
| asiR382* as           | TCAAAAAGTCAACGGCGTCAAACATTGCCCAGCACCAACAATA               |
| Fluc fl F             | actagtATGGAAGACGCCAAAAACATAAAGAAAGG                       |
| Fluc fl R             | ggtaccTTACACGGCGATCTTTCCGCCCT                             |
| Rluc fl F             | actagtATGACTTCGAAAGTTTATGATCCAGAACA                       |
| Rluc fl R             | ggtaccTTATTGTTTCATTTTTGAGAACTCGCTCA                       |
| GU fl F               | ggacaagttgtacaaaaagcaggctaaCACCATGCGTACGTGTCC             |
| GU fl R               | ggggaccactttgtacaagaaagctgggtaGAGGATTGCTGGGACAGAGTAA      |
| GU d5.1 F             | ggacaagttgtacaaaaagcaggctaaCCGGAGAGAAAGTAGGCGATT          |
| GU d3 R               | ggggaccactttgtacaagaaagctgggtaATAATAATTTGCCTTCACTTAACCAGC |
| GU d5.2 F             | ggacaagttgtacaaaaagcaggctaaATGTAGTAGCTTGAATTTGCACGTTG     |
| GUS.1 F               | GGTGGCCATCTGAGCCCTGAGG                                    |
| GUS.1 R               | TTTACCAAAATGCCAGCAGGCGTAGT                                |
| GUS.2 F               | TTAATTAGCAACATTAATACTCCGATGCTCTGT                         |

|                         |                                                                         |
|-------------------------|-------------------------------------------------------------------------|
| GUS.2 R                 | TGTCACAACCGGAGTTTTCCCCTTT                                               |
| GUdM/p221 F             | GTATTAATTAGTCGAGACGCAATTTGCC                                            |
| GUdM/p221 R             | TGGATGTAGTAATAATTTGCCGCGGACA                                            |
| 35S Ter F               | ggacaagttgtacaaaaagcaggctaaCGCTGAAATCACCAGTCTCTCT                       |
| 35S Ter R               | ggggaccactttgtacaagaaagctgggtaCGGTGTGAGGGAAGTACTAGTTTTGAT               |
| WM F                    | ggacaagttgtacaaaaagcaggctaaTCCCAAAATGTTTGACGCCGT                        |
| WM R                    | ggggaccactttgtacaagaaagctgggtaTCCCAAAATGTTTGAAACCGTTAAC                 |
| MM.1 F                  | ggacaagttgtacaaaaagcaggctaaTCCCAAAATGTTTGACGCCGTTGACTT<br>TTTAACCAAT    |
| MM.2 R                  | ggggaccactttgtacaagaaagctgggtaTCCCAAAATGTTTGAAACCGTTAACTT<br>TTTTACCCAT |
| OU1 (Os03g60890) F      | ggacaagttgtacaaaaagcaggctaaAAATCAATATCAGCCCCGATTTACC                    |
| OU1 R                   | ggggaccactttgtacaagaaagctgggtaTTAACCCCTCAAATAACCCAATCTGA                |
| OU2 (Os01g71240) F      | ggacaagttgtacaaaaagcaggctaaTTTTTGCAGGCATTTTGATCATCGT                    |
| OU2 R                   | ggggaccactttgtacaagaaagctgggtaTGAAGGACTATTGTGGAGTTAAAGTA<br>TACGATC     |
| OU3 (Os01g43480) F      | ggacaagttgtacaaaaagcaggctaaTGAAGAATTCATTACTTGTATATACAT<br>TTG           |
| OU3 R                   | ggggaccactttgtacaagaaagctgggtaCATCCAGGGTTCGTCGGCGTC                     |
| <b>RACE primer</b>      | <b>Sequence 5'-&gt;3'</b>                                               |
| 5' RLM-RACE R1          | GAAGAGGATTGCTGGGACAGAGTAAAA                                             |
| 5' RLM-RACE R2          | TTCCTTTCTTGATGGGCAATAACAGT                                              |
| 3' RACE F1              | CCGCTGGCTCTCGCTGGTTAAGTGAA                                              |
| 3' RACE F2              | TGCCATCAAGGAAAGGAACAAAACAAAG                                            |
| <b>qRT-PCR primer</b>   | <b>Sequence 5'-&gt;3'</b>                                               |
| Ghd2 qPCR F             | TTGCCTCCAACAGCAGGG                                                      |
| Ghd2 qPCR R             | GCTTCGGATGAGCGCG                                                        |
| Ehd1 qPCR F             | GGATGCAAGGAAATCATGGA                                                    |
| Ehd1 qPCR R             | AATCCCATCGGAAATCTTGG                                                    |
| Hd1 qPCR F              | TCAGCAACAGCATATCTTTCTCATCA                                              |
| Hd1 qPCR R              | TCTGGAATTTGGCATATCTATCACC                                               |
| Hd3a qPCR F             | CTTCAACACCAAGGACTTCGC                                                   |
| Hd3a qPCR R             | TAGTGAGCATGCAGCAGATCG                                                   |
| Fluc qPCR F             | TTTTGGAGCACGAAAGACG                                                     |
| Fluc qPCR R             | CTTCGTCCACAAACACAACCTCC                                                 |
| Rluc qPCR F             | ATCGGACCCAGGATTCTTTTCC                                                  |
| Rluc qPCR R             | CATCAGGTGCATCTTCTTGCG                                                   |
| Ubi qPCR F              | AACCAGCTGAGGCCCAAGA                                                     |
| Ubi qPCR R              | ACGATTGATTTAACAGTCCATGA                                                 |
| <b>Genotypic primer</b> | <b>Sequence 5'-&gt;3'</b>                                               |
| Hn F                    | TACACAGCCATCGGTCCAGA                                                    |
| Hn R                    | TAGGAGGGCGTGGATATGTC                                                    |
| MEC F                   | GCTGTAAGCATTGTCCGCTAACAT                                                |
| MEC R                   | GAGGATTGCTGGGACAGAGTAAAA                                                |

|                             |                                |
|-----------------------------|--------------------------------|
| Ghd2 cripsr amp F           | TTTGTGCTGGGAGATTTCTT           |
| Ghd2 cripsr amp R           | GCCTCGTAGTTGAGCCTGA            |
| Ghd2 cripsr seq             | TCGGTGGAGGAGGAGGCG             |
| Cas F                       | CGGGATAAGCCCATCAGAGAGC         |
| Cas R                       | GTAAAACGACGGCCAG               |
| <b>bisulfite seq primer</b> | <b>Sequence 5'-&gt;3'</b>      |
| MSP P1 F                    | AATAAGATAGGGATAGTATAATTGTAAGGA |
| MSP P1 R                    | ATCAATAAACTTTTAAAATAAAAACAAT   |
| MSP P2 F                    | YGGAAAAGAGTATTTTATTTGGA        |
| MSP P2 R                    | AAAAACCTCTAAAATCTATACAACACTACT |
| MSP C1 F                    | AGTTYGAGGGGTAGTTGTTGTA         |
| MSP C1 R                    | GCRGCAACTACRGAATACTTT          |
| MSP C2 F                    | GGAAGTTTTATTYGGATAAGGT         |
| MSP C2 R                    | AATTAAACCTAAAATCCAAACTCCTATAAA |
| MSP C3 F                    | GATTATYGAGAGTTGGGGTAAT         |
| MSP C3 R                    | AACCCCTACACCAACACAATTT         |
| MSP U1 F                    | TATGGATTYGATTGGTATAAAAAG       |
| MSP U1 R                    | TAATRGTCRRGATAAATTTTCAA        |
| <b>ChIP-qPCR primer</b>     | <b>Sequence 5'-&gt;3'</b>      |
| ChP p1 F                    | GGGATAGCACAACCTGCAAGG          |
| ChP p1 R                    | TAGTGAGCCCCACCGATAAG           |
| ChP p2 F                    | TTCCACCCACGTGTCATAAA           |
| ChP p2 R                    | CGGATAAGGGCCATACTTGA           |
| ChP c1 F                    | CAGGTCAAGAGCGTCGGGC            |
| ChP c1 R                    | GCGAGGGAGGGGTCAAAGAC           |
| ChP c2 F                    | CAGGCTCAACTACGAGGCGAT          |
| ChP c2 R                    | CCGAGTAATGGTGGTCGTTGG          |
| ChP u1 F                    | TCGGTGCTTTTGGATCTCTT           |
| ChP u1 R                    | CAGGCACAACCCAGTTTACA           |
| ChP u2 F                    | AACAACGGGTTTTGGTCTCTGC         |
| ChP u2 R                    | TTGAAGAAGAGGATTGCTGGGAC        |
| Copia F                     | TTTAGATGACATCCCATATGTTCTTTTC   |
| Copia R                     | GGATGTAAAGACGGCATTCTCTAAA      |
| Actin F                     | TGCGTCAGGAATTCAGAACCA          |
| Actin R                     | AGCACCACGAACCTTGACCAT          |
| <b>Probe name</b>           | <b>Sequence 5'-&gt;3'</b>      |
| sR381 probe                 | T+GA+CC+GTT+CGT+CTTATT+CA      |
| sR382 probe                 | AAT+GTT+TGA+CGC+CGTTGA+CTTT    |
| miR168 probe                | GTCCCGATCTGCACCAAGCGA          |
| U6 probe                    | TGTATCGTTCCAATTTTATCGGATGT     |

---

In the locked nucleic acid (LNA) probe, the LNA-modified nucleotide is shown as +N.
